# Supplementary material for: A Neonatal Sepsis Prediction Algorithm Using Electronic Medical Record Data
Source: Research Square preprint supplement (doi:10.21203/rs.3.rs-1353776/v1), 2022-03-01
Supplement: Supplementary file 1 [file 6751707c7bf84a6a2305ee4b.docx]

**Supplementary Table 1:** Data Abstraction Tool

**SECTION 1: BASIC INFORMATION**

|  | **Site:** |  | |
| --- | --- | --- | --- |
|  | **Patient’s ID Code:** |  | |
|  | **Patient’s Medical Record Number:** |  | |
|  | **Address:** |  | |
|  | **Age (in days):** |  | |
|  | **Gender:** | Male | Female |
|  | **Race/Ethnicity:** |  | |

**SECTION 2: MEDICAL RECORD**

|  | **How many hospital visits have occurred from the date of birth?** |  | |
| --- | --- | --- | --- |
|  | **Did this visit result in hospitalization?** | Yes | No |
|  | **Did this hospitalization occur within the week of birth?** | Yes | No |
|  | **How long is the hospitalization from the date of birth?** |  | |
|  | **What was the diagnosis(es) for this hospitalization?** |  | |
|  | **What was the chief complaint for this hospitalization?** |  | |

**SECTION 3: MATERNAL RISK FACTORS**

|  | **Attributes** | **Grades** |  |
| --- | --- | --- | --- |
|  | **Intrapartum fever** | <38◦C | ≥38◦C |
|  | **Chorioamnionitis** | Yes | No |
|  | **Duration of ROM** | <18 hours | ≥18 hours |
|  | **GBS colonization** | Positive | Negative |
|  | **Intrapartum antibiotics** | <4 hours prior to delivery | ≥4 hours prior to delivery |
|  | **Maternal Febrile During Pregnancy** | Yes | No |
|  | **Duration of Labor** | <18 hours | ≥18 hours |
|  | **Foul Odor of the Amniotic Fluid** | Yes | No |

**SECTION 4: NEONATAL SIGNS**

|  | **Attributes** | **Grades** |  |
| --- | --- | --- | --- |
|  | **Gestational age** | <37 weeks | ≥37 weeks |
|  | **Birth weight** | <1.5 kg | ≥1.5 kg |
|  | **Heart rate** | ≤100 BPM | ≥160 BPM |
|  | **Postnatal distress** | Yes | No |
|  | **Feeding difficulty** | Yes | No |
|  | **Temperature** | ≤36.5°C | ≥38°C |
|  | **Respiratory Distress** | Yes | No |
|  | **Apnea** | Yes | No |
|  | **Lethargy** | Yes | No |

**SECTION 5: LABORATORY TESTS**

|  | **Attributes** | **Grades** |  |
| --- | --- | --- | --- |
|  | **Absolute neutrophil count (ANC)** | ≤1,750 x109/l | >1,750 x109/l |
|  | **C reactive protein (CRP)** | <10mg/L | ≥10mg/L |
|  | **I/T ratio** | ≤0.2 | >0.2 |
|  | **Micro-ESR (M-ESR)** | <8 mm/1st hour | ≥8 mm/1st hour |
|  | **Platelet count** | ≤150 000 x109/l | >150 000 x109/l |
|  | **Total leukocyte count (TLC)** | ≤5000 x109/l | >5000 x109/l |
|  | **White Blood Cell Count (WBC)** | ≤5,000 x109/l | ≥30,000 x109/l |

Supplementary table 1 above shows the data abstraction tool used to retrieve information essential to the study.
